# Should we individualize lipid profiling in women with polycystic ovary syndrome?

Inger Sundström Poromaa<sup>1,\*</sup>, Jan Roar Mellembakken<sup>2</sup>,  
Laure Morin-Papunen<sup>3,4</sup>, Terhi Piltonen<sup>3,4</sup>, Johanna Puurenen<sup>3,4</sup>,  
Juha S. Tapanainen<sup>3,4,5</sup>, Elisabet Stener-Victorin<sup>6</sup>,  
Angelica Lindén Hirschberg<sup>7</sup>, Eszter Vanky<sup>8,9</sup>, Pernille Ravn<sup>10</sup>,  
Dorte Glintborg<sup>11</sup>, and Marianne Andersen<sup>11</sup>

<sup>1</sup>Department of Women's and Children's Health, Uppsala University, Uppsala, Sweden <sup>2</sup>Section for Reproductive Medicine, Department of Gynaecology, Women's Division, Oslo University Hospital, Oslo, Norway <sup>3</sup>Department of Obstetrics and Gynaecology, Oulu University Hospital, University of Oulu, Oulu, Finland <sup>4</sup>PEDEGO Research Unit, Medical Research Centre, Oulu, Finland <sup>5</sup>Department of Obstetrics and Gynaecology, Helsinki University Hospital and University of Helsinki, Helsinki, Finland <sup>6</sup>Department of Physiology and Pharmacology, Karolinska Institutet, Stockholm, Sweden <sup>7</sup>Department of Women's and Children's Health, Karolinska Institutet, Stockholm, Sweden <sup>8</sup>Department of Obstetrics and Gynaecology, St. Olav's Hospital, Trondheim University Hospital, Trondheim, Norway <sup>9</sup>Department of Laboratory Medicine, Children's and Women's Health, Norwegian University of Science and Technology, Trondheim, Norway <sup>10</sup>Department of Gynaecology and Obstetrics, Odense University Hospital, Odense, Denmark <sup>11</sup>Department of Endocrinology, Odense University Hospital, Odense, Denmark

\*Correspondence address. Department of Women's and Children's Health, Uppsala University, Uppsala, Sweden.  
E-mail: Inger.sundstrom@kbh.uu.se

*Hum Reprod* 2016;**31**:2791–2795

The authors would like to apologize for a typing error in the surname of one of the authors of this article. Laure M Papunen should be listed as Laure Morin-Papunen.

The authors would like to assure readers that this does not affect any content of the article.
